# Supplementary material
Source: publisher site journal article supplement (https://www.spandidos-publications.com/4447/downloadSupplementary)
Supplement: Supplementary file 1 [file downloadSupplementary]

## Sheet: CDC25A.kegggsea
Table SXIII. The single-gene Gene Set Enrichment Analysis results for CDC25A in the GSE40275 dataset
ID	Description	setSize	enrichmentScore	NES	pvalue	p.adjust	qvalues	rank	leading_edge	core_enrichment
hsa04740	Olfactory transduction	385	-0.341179	-1.71403	2.27006e-07	4.00207e-05	3.48823e-05	3673	tags=65%, list=44%, signal=38%	81470/403253/135948/390154/81318/219983/79544/119774/390321/391114/219958/6547/393046/219487/79541/504191/138802/441608/390264/390436/81392/441669/390195/219954/401992/341568/285659/347468/219965/81797/138803/122748/219431/401667/219447/346525/81469/81696/403278/81168/79345/138799/119678/390892/390075/392138/158131/127062/254783/282763/390036/125963/26248/26211/401993/26531/391109/390433/219952/8…
hsa04110	Cell cycle	82	0.571562	2.11695	2.54909e-07	4.00207e-05	3.48823e-05	1015	tags=38%, list=12%, signal=34%	898/993/5347/5111/5933/1111/1029/9133/6502/890/995/1017/8317/1031/991/8243/699/891/8881/990/9232/701/10912/994/7529/10971/9134/7465/9184/7532/1647
hsa03030	DNA replication	22	0.757503	2.1736	4.81541e-06	0.000397317	0.000346304	1419	tags=77%, list=17%, signal=64%	5427/5111/5982/23649/2237/10535/5983/5557/5426/10714/5425/5985/5984/246243/5424/5422/84153
hsa03460	Fanconi anemia pathway	27	0.710829	2.13535	5.06136e-06	0.000397317	0.000346304	664	tags=56%, list=8%, signal=51%	55120/2177/83990/2175/2189/2176/79728/672/5888/7398/80010/2187/51455/2188/675
hsa03440	Homologous recombination	20	0.753939	2.10663	1.96809e-05	0.00116672	0.00101692	1059	tags=65%, list=13%, signal=57%	7516/83990/79728/8438/672/5932/5888/580/10714/5425/675/5424/7517
hsa05150	Staphylococcus aureus infection	38	0.625182	1.98725	2.22941e-05	0.00116672	0.00101692	1511	tags=58%, list=18%, signal=48%	713/3126/716/3109/3122/3127/3123/717/3113/714/712/2214/3108/3125/3119/3426/5724/718/719/715/3075/3115
hsa05168	Herpes simplex virus 1 infection	353	0.361548	1.59203	3.22405e-05	0.0013673	0.00119175	1747	tags=35%, list=21%, signal=29%	162655/91120/3126/10224/598/81931/79230/284307/3109/10000/972/388567/349075/3122/84671/3127/684/90594/79088/340252/7644/207/199704/3123/7988/3113/7733/6009/58492/147660/90233/163223/57786/25888/93474/7730/388558/3054/84765/140612/10793/29990/3106/7695/81856/3133/170959/26152/163227/7559/255403/7561/5499/94039/84436/348327/57541/3108/163081/92283/7638/388566/79724/27300/3134/90592/91661/282890/271…
hsa04114	Oocyte meiosis	81	0.518361	1.91839	3.48357e-05	0.0013673	0.00119175	1469	tags=38%, list=18%, signal=32%	898/6790/5347/107/9133/26271/995/1017/991/286151/8243/699/891/8881/5529/817/9232/5528/109/7529/10971/5499/9134/7532/64682/5567/114/805/5534/9088/818
hsa05322	Systemic lupus erythematosus	40	0.615089	1.98927	6.36977e-05	0.00222234	0.00193701	1511	tags=50%, list=18%, signal=41%	713/3126/716/3109/3122/3127/3123/717/3113/714/712/2214/3108/3125/3119/87/730/718/715/3115
hsa02010	ABC transporters	42	-0.567718	-2.01156	0.000103532	0.0032509	0.0028335	495	tags=33%, list=6%, signal=32%	23457/6833/10058/10057/215/5825/10257/19/154664/26154/10350/23460/10349/23461
hsa05166	Human T-cell leukemia virus 1 infection	120	0.435515	1.70736	0.000196865	0.00561959	0.00489807	1391	tags=36%, list=17%, signal=30%	898/1111/107/1029/9133/890/6513/1017/1031/3126/598/3109/991/10000/3122/8881/3127/207/3123/3113/9232/701/109/55697/3106/7514/3133/292/9134/9184/3108/3134/3125/3119/64682/5567/2874/114/2224/811/8498/1147/5534
hsa01230	Biosynthesis of amino acids	43	0.561168	1.84594	0.000633128	0.0165669	0.0144398	1656	tags=47%, list=20%, signal=37%	84706/29968/26227/5631/440/6470/384/2752/5634/5723/586/2597/875/5230/2806/226/2805/6472/5224/435
hsa03430	Mismatch repair	12	0.755188	1.84619	0.000779084	0.0188179	0.0164018	1043	tags=75%, list=13%, signal=66%	5111/9156/5982/5983/10714/5425/5985/5984/5424
hsa04914	Progesterone-mediated oocyte maturation	56	0.521947	1.80718	0.000937147	0.0210189	0.0183202	654	tags=27%, list=8%, signal=25%	6790/993/5347/107/9133/890/995/1017/10000/699/891/8881/207/994/109
hsa04080	Neuroactive ligand-receptor interaction	207	-0.317482	-1.49079	0.00115446	0.0241666	0.0210638	2584	tags=40%, list=31%, signal=28%	5173/2555/2488/2913/8484/55584/5023/2695/9248/2492/728/3274/2587/57053/7432/22953/116444/2741/165829/2906/2797/2903/5028/10888/3061/51052/4923/554/1142/2688/2559/2798/8973/1135/552/9568/5617/2567/10203/286530/4985/5618/8811/2911/5644/1081/2570/147/2150/148/3269/885/5646/1128/2892/5737/1140/2690/5645/2696/2901/153/183/2569/1129/154/2563/2891/2834/2917/5027/2925/5733/5179/4986/2691/146/10911/155/29…
hsa04940	Type I diabetes mellitus	31	0.606076	1.86756	0.00129994	0.0255114	0.0222359	1139	tags=45%, list=14%, signal=39%	2572/5799/3126/3109/3122/3127/3123/3113/3106/3133/3108/3134/3125/3119
hsa00564	Glycerophospholipid metabolism	53	-0.461145	-1.71194	0.00149452	0.0264337	0.0230398	1566	tags=42%, list=19%, signal=34%	255189/122618/283748/5338/2819/50487/23171/10555/56894/9791/1120/8398/5320/5319/56895/23761/1040/10390/1103/8605/162466/9468
hsa05310	Asthma	21	0.638331	1.81336	0.00151531	0.0264337	0.0230398	1139	tags=48%, list=14%, signal=41%	3126/3109/3122/3127/2207/3123/3113/3108/3125/3119
hsa03013	RNA transport	63	0.483519	1.70777	0.00198551	0.0317007	0.0276305	1517	tags=41%, list=18%, signal=34%	9631/23225/23165/8480/65109/57122/10248/57510/9883/6606/10775/7514/23279/10605/79833/9972/1207/2521/4927/9939/5976/55746/11260/79902/9513/9688
hsa04612	Antigen processing and presentation	43	0.530835	1.74617	0.00201915	0.0317007	0.0276305	1511	tags=42%, list=18%, signal=34%	3126/3109/972/3122/3127/3304/3123/3113/3303/3106/3133/3108/3134/3125/3119/3320/811/3115
hsa04218	Cellular senescence	93	0.412146	1.56583	0.00338436	0.0484911	0.0422651	1015	tags=25%, list=12%, signal=22%	898/993/2305/5933/1111/1029/9133/890/5810/1017/10000/891/28996/207/6009/10912/3106/3133/292/5499/9134/3134/1647
hsa03410	Base excision repair	24	0.602524	1.759	0.00339747	0.0484911	0.0422651	1977	tags=58%, list=24%, signal=45%	5427/5111/2237/5426/10714/142/5425/7374/5424/10038/23583/3146/27301/7515
